# Supplementary material for: Adaptation and possible ancient interspecies introgression in pigs identified by whole-genome sequencing
Source: Springer Nature journal article supplement (doi:10.1038/ng.3199), 2015-01-26
Supplement: 41588_2015_BFng3199_MOESM33_ESM.xlsx [file 41588_2015_BFng3199_MOESM33_ESM.xlsx]

## Sheet: Fig5a
	EWB			EDP			NCWB			NCDP			SCDP			SCWB			SMWB			JVWP			VWP			SBAR			CLWB
	14M	34M	30M	14M	34M	30M	14M	34M	30M	14M	34M	30M	14M	34M	30M	14M	34M	30M	14M	34M	30M	14M	34M	30M	14M	34M	30M	14M	34M	30M	14M	34M	30M
EWB	0.0841539	0.145431	0.690678
EDP	0.242115	0.186378	0.855682	0.164922	0.15006	0.877357
NCWB	0.331642	0.296035	2.00988	0.361673	0.312085	2.03174	0.103542	0.0583798	1.09955
NCDP	0.347686	6.0469	2.08881	0.370825	6.05751	2.06618	0.117907	6.02686	1.58538	0.096667	0.048868	1.3384
SCDP	6.6058	6.04673	2.2204	6.63611	6.05721	2.15866	6.61171	6.02881	1.73653	6.64198	0.109264	1.57692	0.0832847	0.0965842	1.32673
SCWB	6.57726	6.04443	2.28825	6.6076	6.05497	2.24252	6.58355	6.02535	1.80459	6.61345	0.0852088	1.7016	0.127157	0.115724	1.68102	0.0904942	0.0661629	1.44807
SMWB	6.49818	6.01548	2.6174	6.52712	6.02567	2.58227	6.50171	5.9965	2.42026	6.53059	0.777087	2.29765	0.866475	0.756941	2.27427	0.837839	0.747505	2.19681	0.0319015	0.0263928	0.122394
JVWP	5.87024	5.43975	4.39608	5.89684	5.44918	4.39606	5.87695	5.42537	4.35438	5.89935	2.04887	4.29124	2.22875	2.03175	4.2771	2.2028	2.02704	4.23184	2.1528	2.00891	4.14623	-	-	-
VWP	6.39547	5.82262	4.67307	6.42163	5.8321	4.67756	6.3992	5.80759	4.64249	6.42199	2.49837	4.58477	2.82985	2.48142	4.57664	2.80149	2.47579	4.51778	2.73789	2.44272	4.40749	1.69064	1.46485	1.88794	-	-	-
SBAR	6.49346	5.9669	4.85859	6.52081	5.97623	4.86315	6.49779	5.95146	4.82831	6.52286	2.64313	4.76983	2.93363	2.62637	4.75955	2.90541	2.62087	4.70649	2.84239	2.58755	4.59241	1.79721	1.61383	1.97045	0.769623	0.717674	1.55051	-	-	-
CLWB	6.47132	5.97506	5.03494	6.49655	5.98428	5.04075	6.47634	5.96012	5.00178	6.49784	2.65436	4.95119	2.92636	2.63768	4.94377	2.89742	2.63192	4.8844	2.83373	2.59711	4.76678	1.7858	1.61771	2.11062	0.76426	0.728145	1.69395	0.472334	0.436294	1.3879	-	-	-
AWH	7.98857	7.82828	8.02123	8.01225	7.83512	8.02851	7.98671	7.81603	7.98318	8.00437	7.51424	7.96277	7.68252	7.50345	7.94709	7.65537	7.49866	7.92017	7.61936	7.48734	7.88206	7.01654	6.95092	7.3493	7.55652	7.33003	7.5547	7.65484	7.47185	7.74885	7.63958	7.47916	7.90006

## Sheet: Fig5b
Chromosome	Position range	ML Tree
Chr2	44-57.8M	(((((((NCDP:0.04853783,NCWB:0.05055074)1.0000:0.01538551,SCDP:0.05002420)0.5140:0.01063652,SCWB:0.05184382)1.0000:0.01302860,(EDP:0.02605085,EWB:0.03351130)1.0000:0.05009083)1.0000:0.02098548,SMWB:0.07946122)1.0000:0.09139475,(JVWP:0.08055476,(VWP:0.05505370,(BP:0.04797360,CLWB:0.05704947)1.0000:0.02202381)1.0000:0.02922907)1.0000:0.07836699)0.0000:0.07795976,AWH:0.27994137);
ChrX	44-57.8M	((((((BP:0.01773146,CLWB:0.01631167)1.0000:0.01397833,VWP:0.02249702)1.0000:0.05378250,JVWP:0.03805200)1.0000:0.00000010,(SMWB:0.02753923,(SCDP:0.00499820,SCWB:0.00421934)1.0000:0.02789938)1.0000:0.09390730)1.0000:0.12786535,((NCDP:0.00979637,NCWB:0.00445548)1.0000:0.00798802,(EDP:0.00763278,EWB:0.00485395)1.0000:0.00474257)1.0000:0.33696992)0.0000:0.09432428,AWH:0.44907858);
ChrX	57.8-91.5M	((((((SCDP:0.00150353,NCDP:0.00193397)1.0000:0.00300180,SCWB:0.00184772)1.0000:0.02541643,SMWB:0.02630633)1.0000:0.07897030,(JVWP:0.03719739,(VWP:0.01988886,(BP:0.01497283,CLWB:0.01563103)1.0000:0.01621193)1.0000:0.05064555)0.9990:0.00895388)1.0000:0.11362954,(NCWB:0.00982169,(EDP:0.00737623,EWB:0.00678308)1.0000:0.00360351)1.0000:0.35279401)0.0000:0.13100476,AWH:0.49477851);
